# Supplementary material
Source: PubMed Central journal article supplement (PMC6192037)

**Figure S1A:** Compares staining for cell segmentation markers (pan cytokeratin – tissue); pan-cadherin (breast carcinoma); NaKATPase (invasive ductal carcinoma); S6 (invasive ductal carcinoma) using primary secondary antibodies, direct conjugate and after 10 rounds of exposure to the dye inactivation solution.

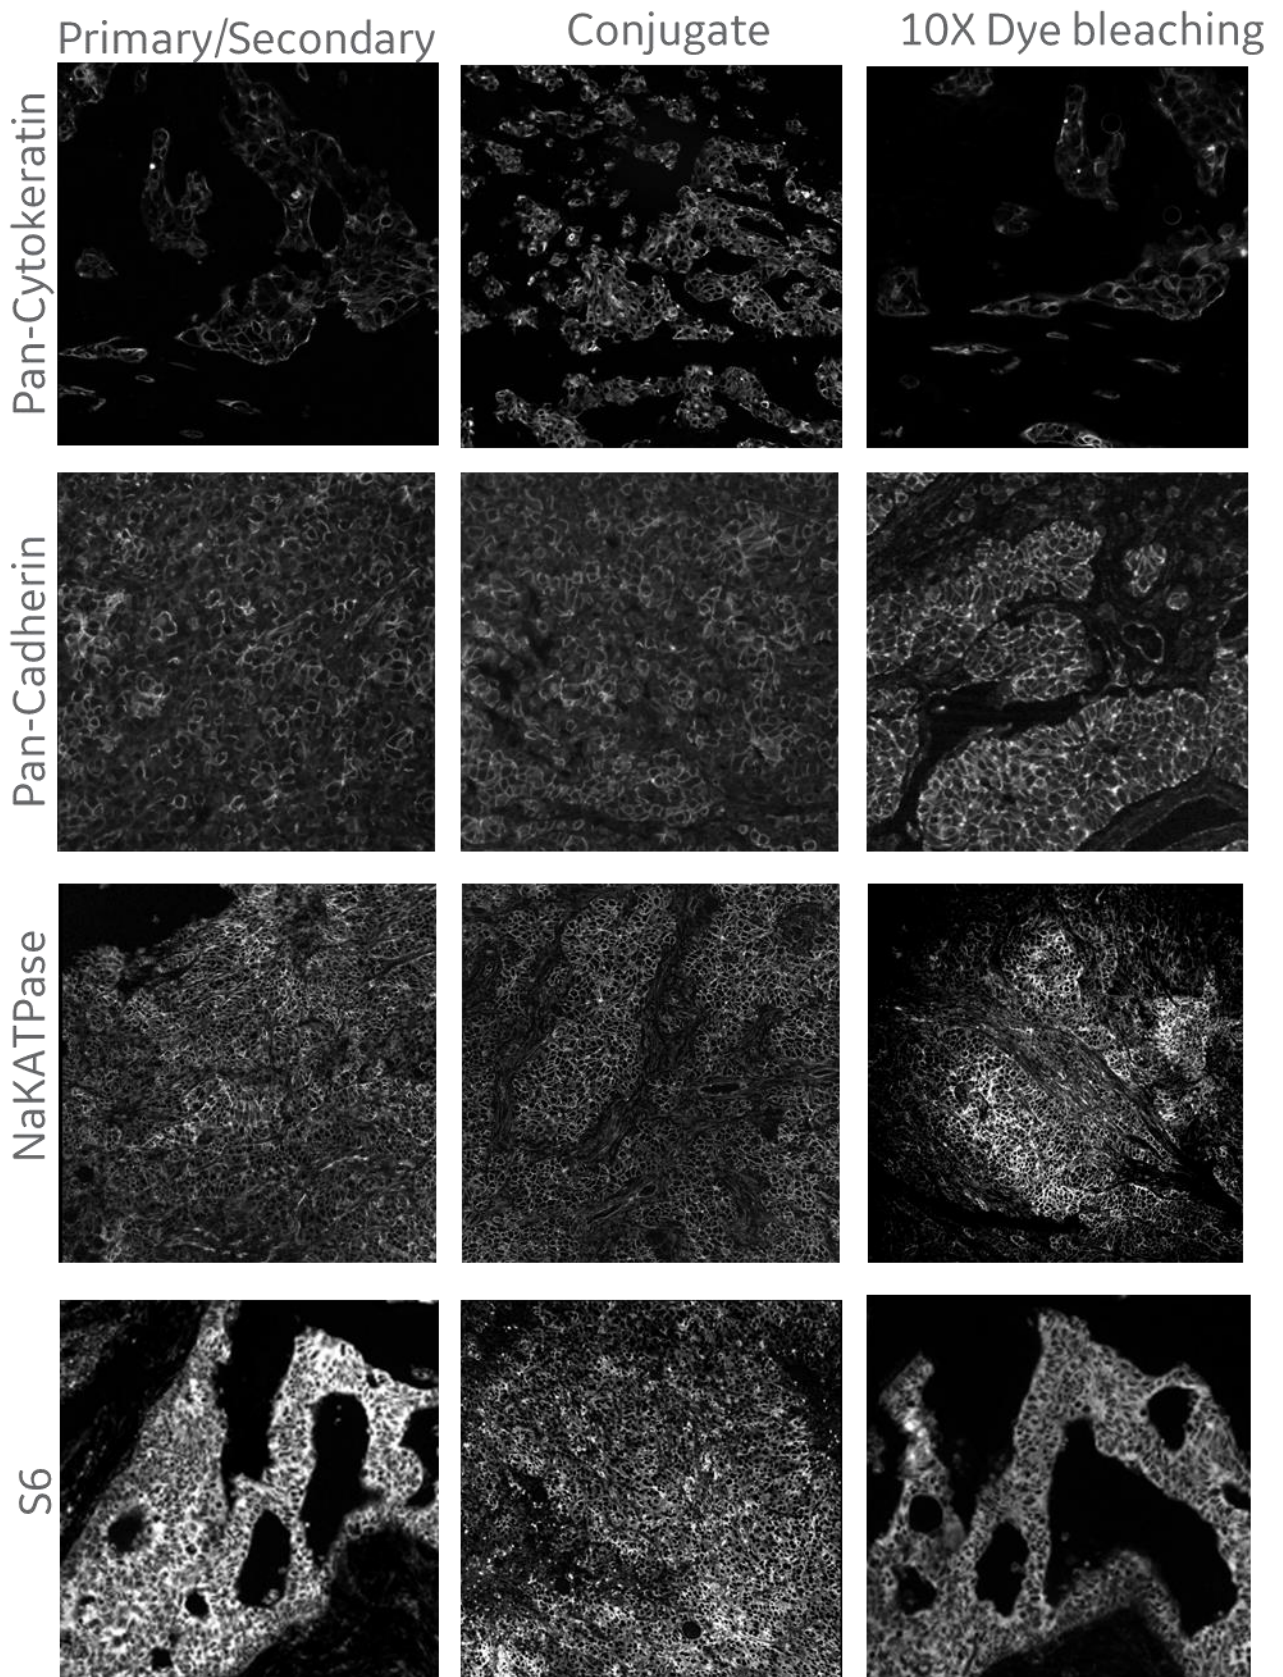

**Figure S1B:** Compares staining for tumor expressing markers: EGFR (lung carcinoma); HER2 (invasive ductal carcinoma); Her4 (invasive ductal carcinoma); p-mTOR (invasive ductal carcinoma) and SLC7A5 (invasive ductal carcinoma) using primary secondary antibodies, direct conjugate and after 10 rounds of exposure to the dye inactivation solution.

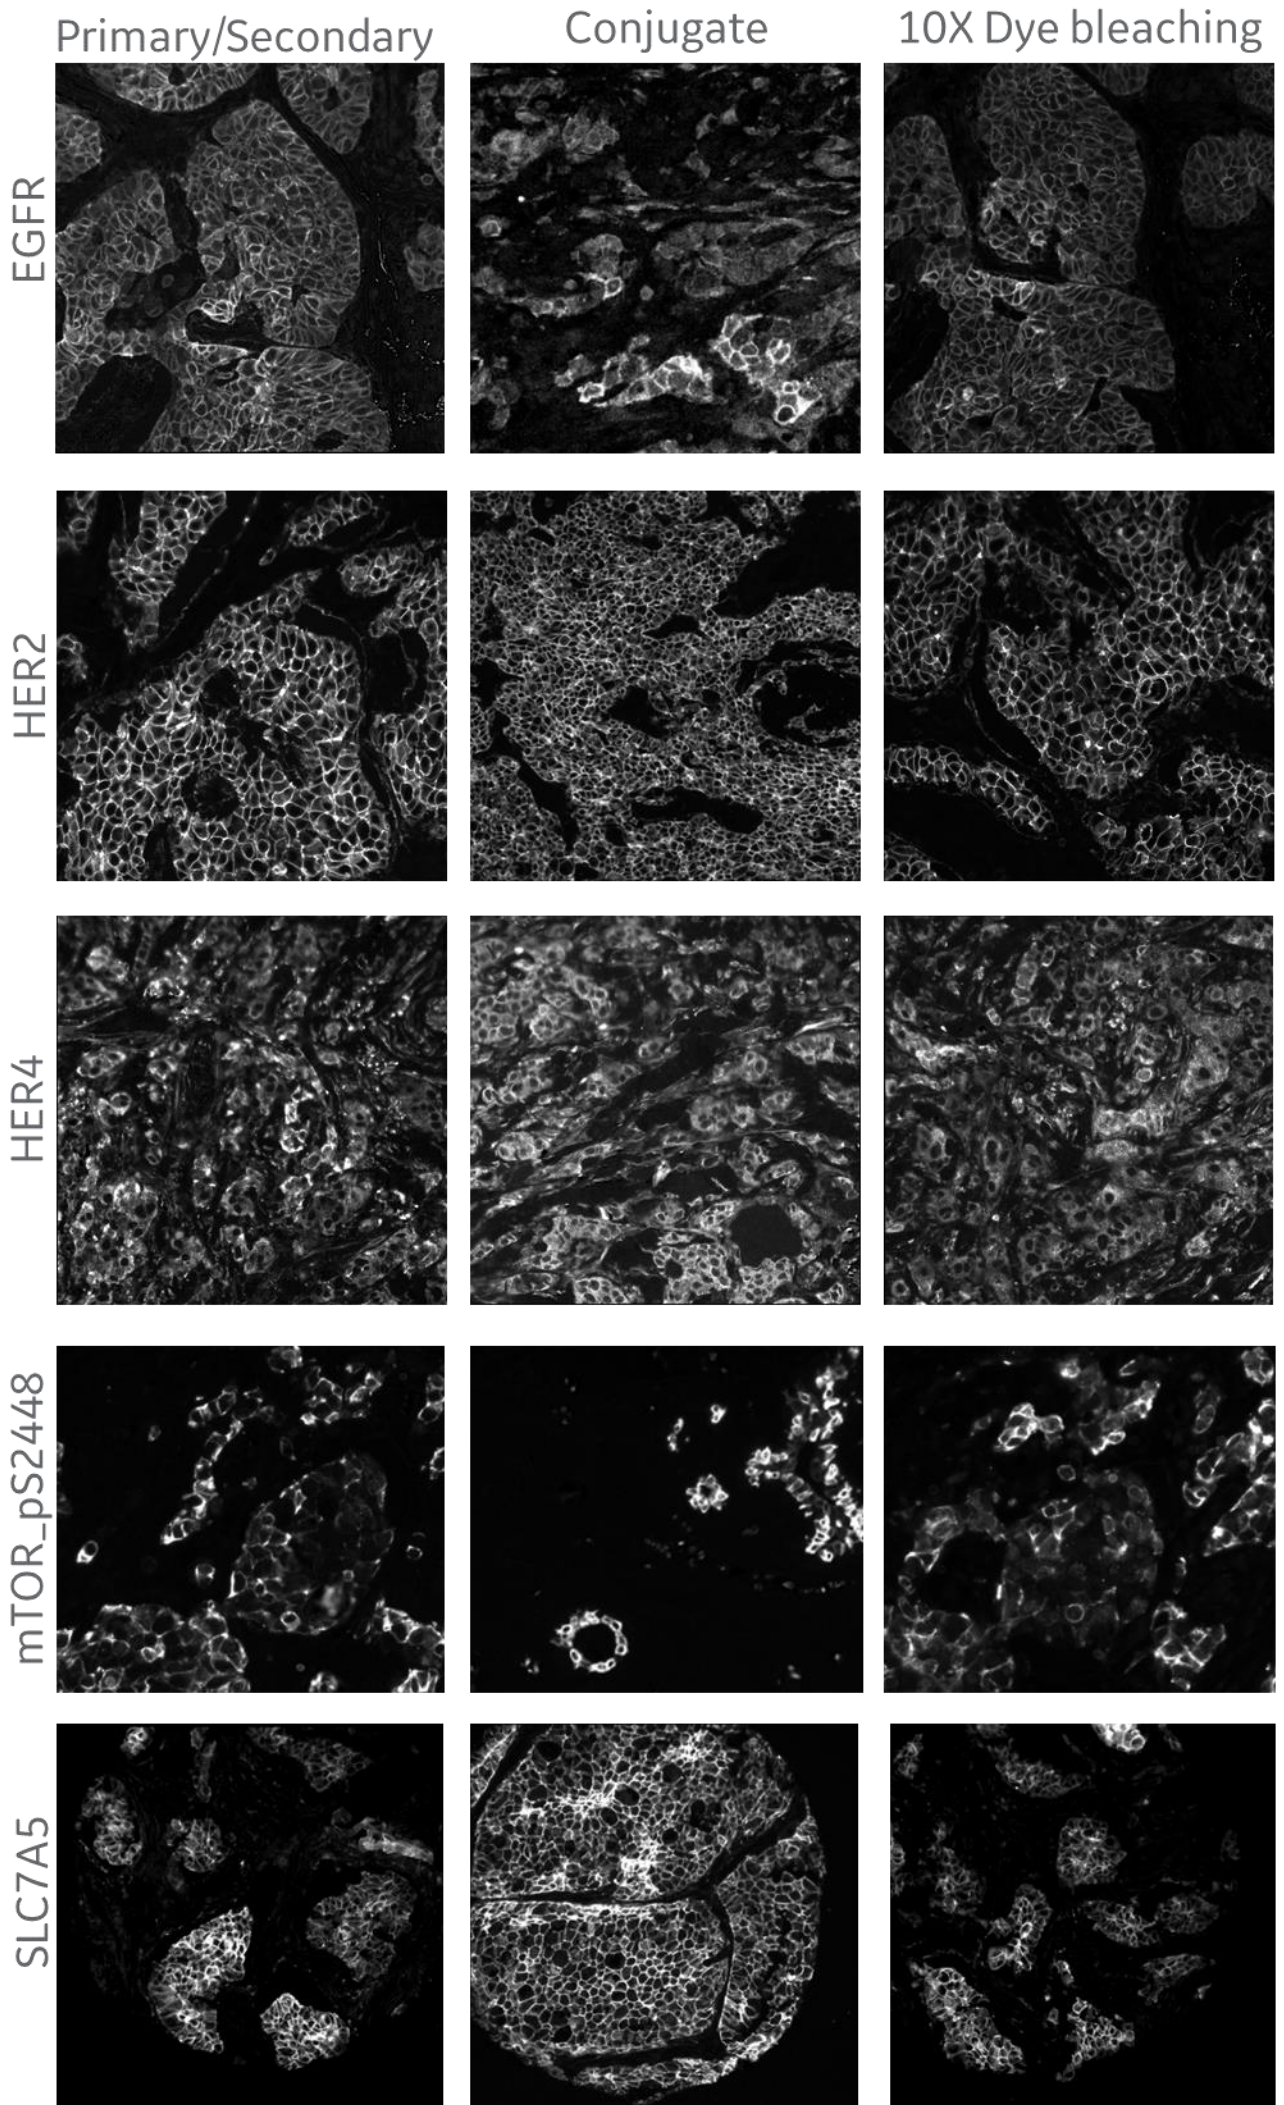

**Figure S1C:** Compares staining for CD markers: CD44v6 (lung carcinoma); CD10 (normal breast and invasive ductal carcinoma); CD4 (colon); CD8 (tonsil) and CD20 (Hodgkin Lymphoma) using primary secondary antibodies, direct conjugate and after 10 rounds of exposure to the dye inactivation solution.

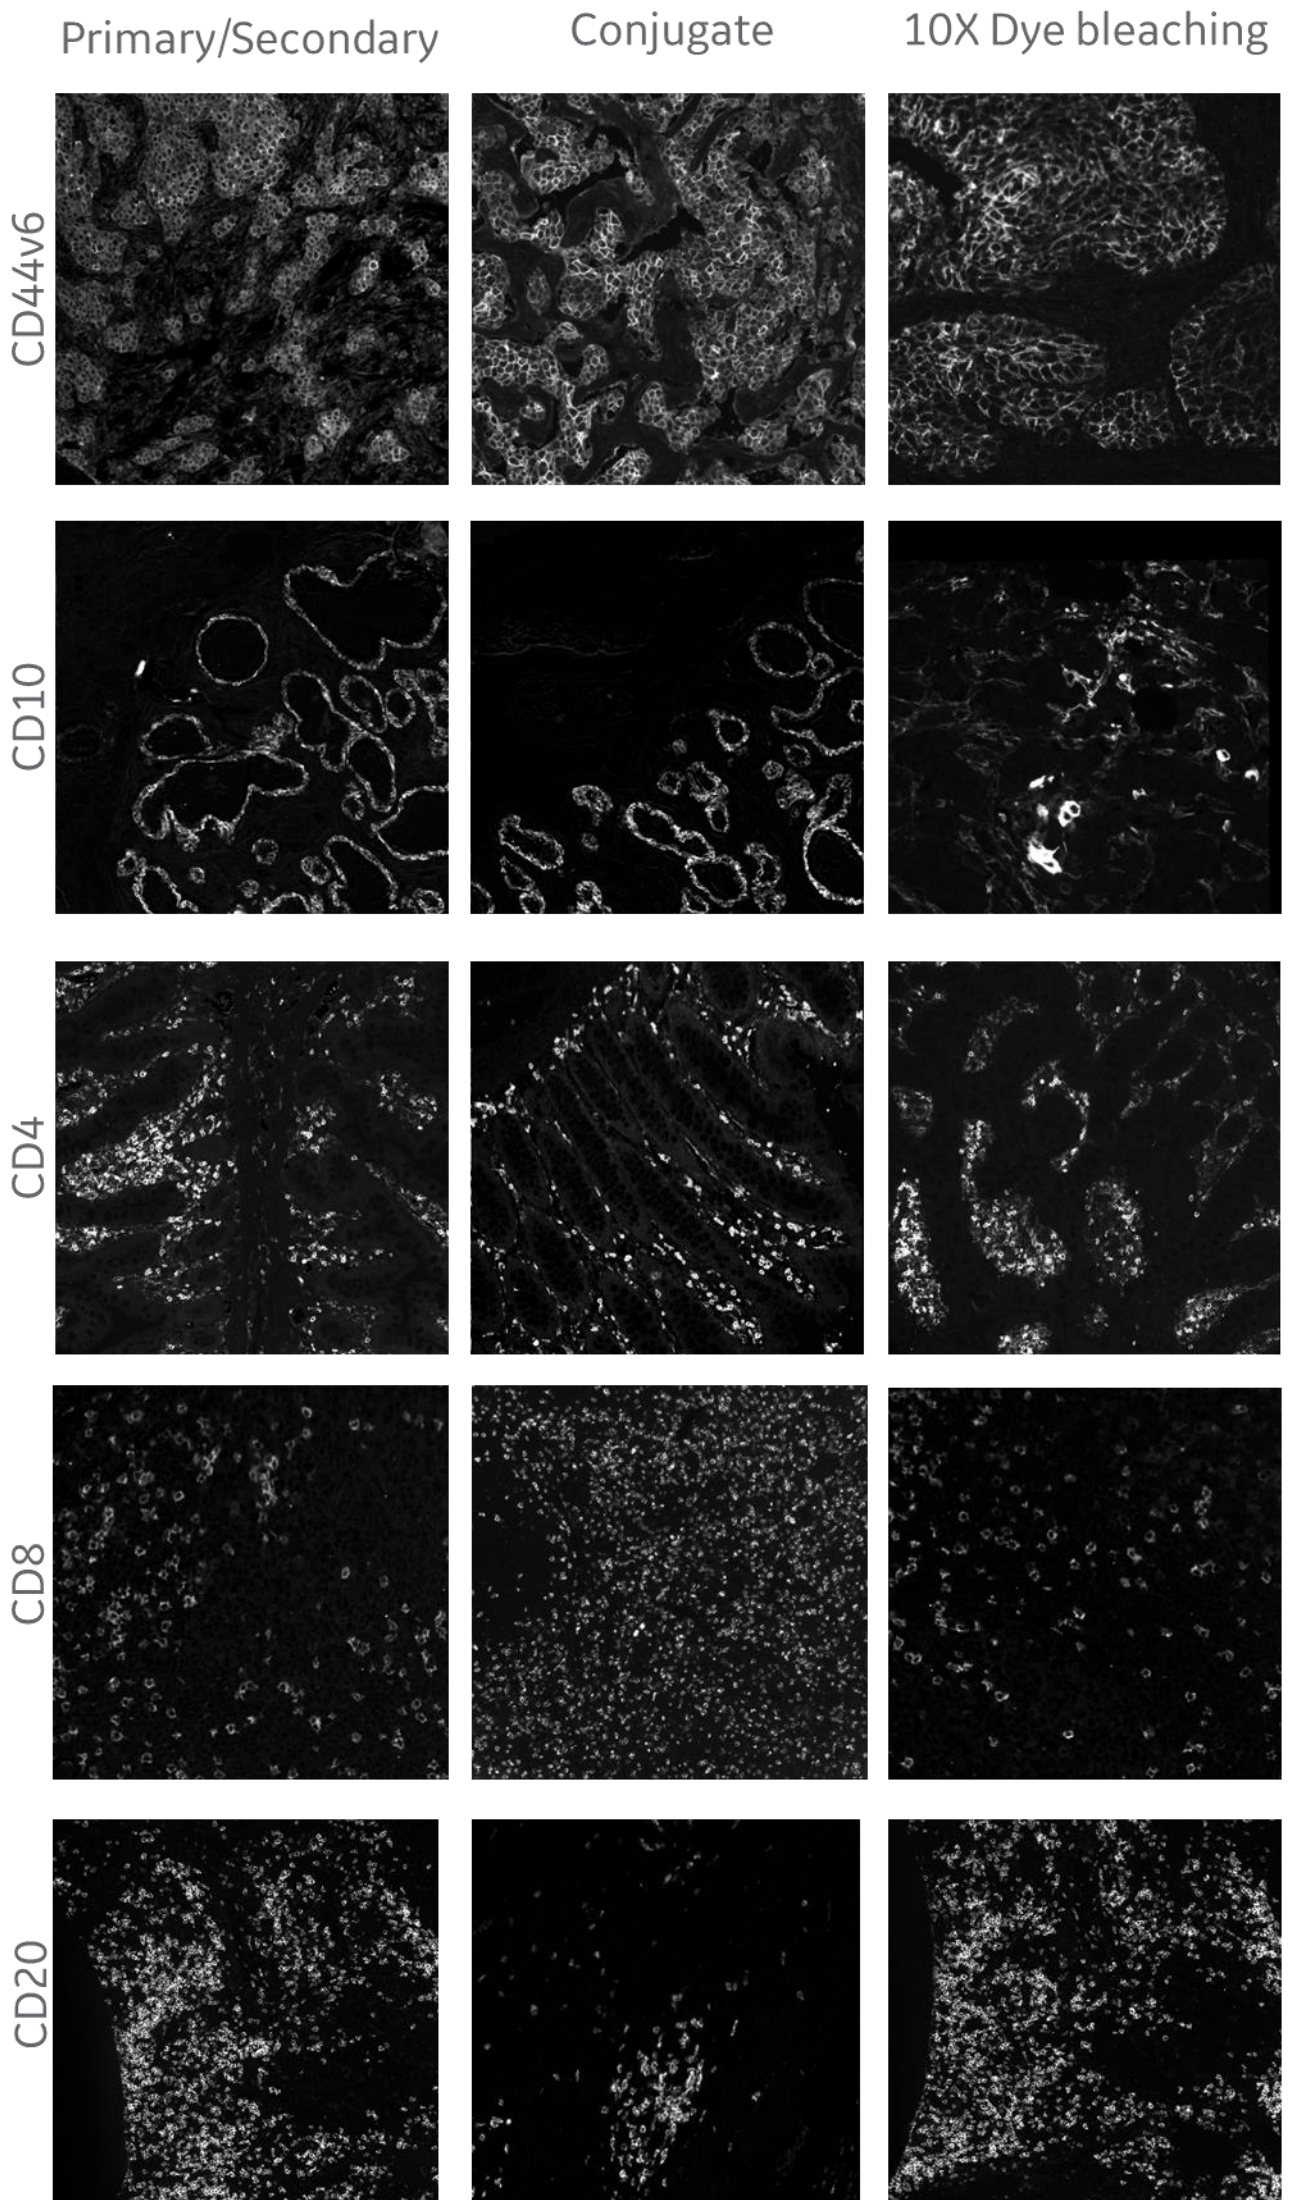

Supplement: NIHMS905662-supplement-Figure_S1.pdf [file NIHMS905662-supplement-Figure_S1.pdf]
