# Supplementary material
Source: PubMed Central journal article supplement (PMC6192037)

**Figure S2** shows example representative images for each marker and each round of staining. Due to tumor and marker heterogeneity, it was not feasible to use the same case number and FOV for each marker, therefore representative examples were chosen with corresponding case number and FOV number included.

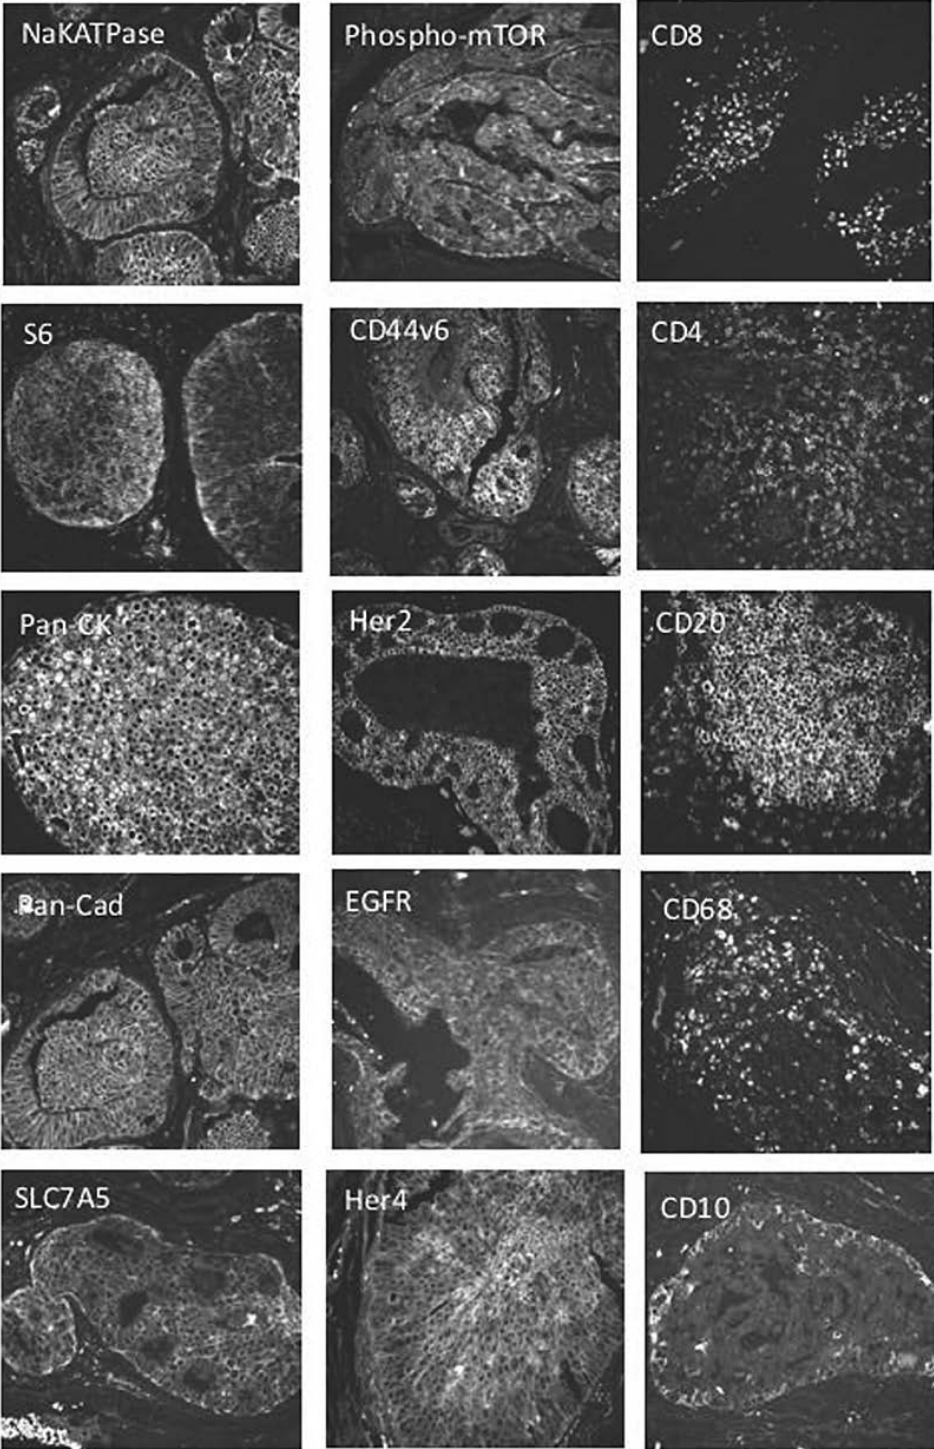

Supplement: NIHMS905662-supplement-Figure_S2.pdf [file NIHMS905662-supplement-Figure_S2.pdf]
